# Supplementary material for: Direct Bacterial Killing In Vitro by Recombinant Nod2 Is Compromised by Crohn's Disease-Associated Mutations
Source: PubMed Central journal article supplement (PMC2879363; doi:10.1371/journal.pone.0010915), 2010-06-01

### Supplementary Figure 3.

Bacterial aggregation following incubation with recombinant Nod2 LRR domains. Bacteria were incubated overnight with 1mg/ml (a,c,e) or 20µg/ml (g) of BSA or equal concentrations of purified Nod2 LRR domains (b,d,f,h). **A-F**, Treated bacteria were incubated with membrane dye to help visualisation. Each sample was mixed by vortexing, a sample placed on a coverslip and observed by fluorescent microscopy. **A,B**, *Staphylococcus aureus*, **C,D**, *Streptococcus pneumoniae*, **E,F**, *Enterococcus faecalis*. **G,H**, *E.coli* were incubated as described above and visualised by phase microscopy.

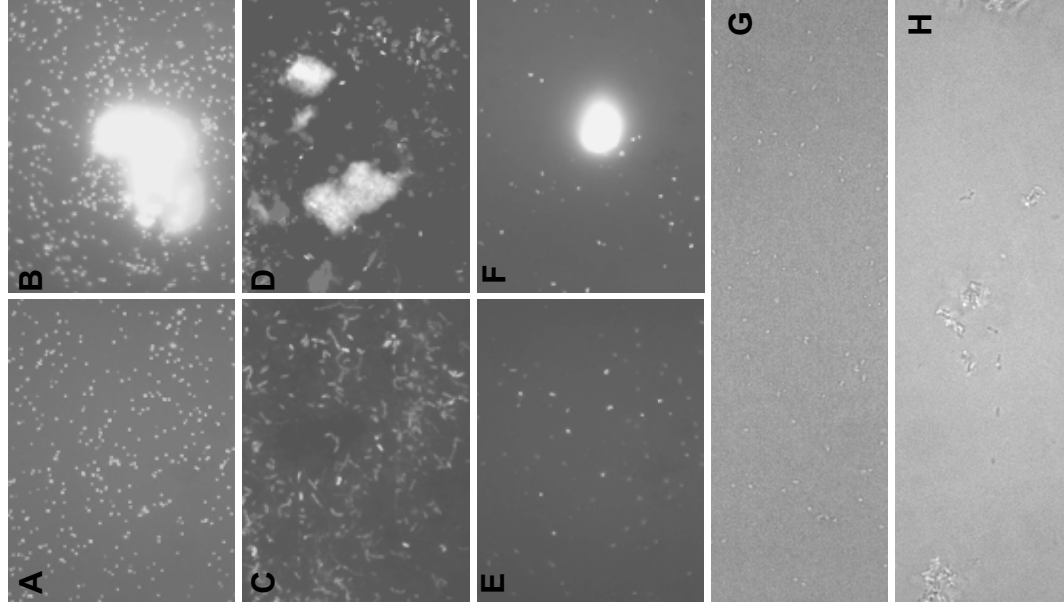

Supplement: pone.0010915.s003.pdf [file pone.0010915.s003.pdf]
