# Supplementary material for: Direct Bacterial Killing In Vitro by Recombinant Nod2 Is Compromised by Crohn's Disease-Associated Mutations
Source: PLOS journal article supplement (doi:10.1371/journal.pone.0010915), 2010-06-01
Supplement: S4 (10.1371/journal.pone.0010915.s004) [file journal.pone.0010915.s004]

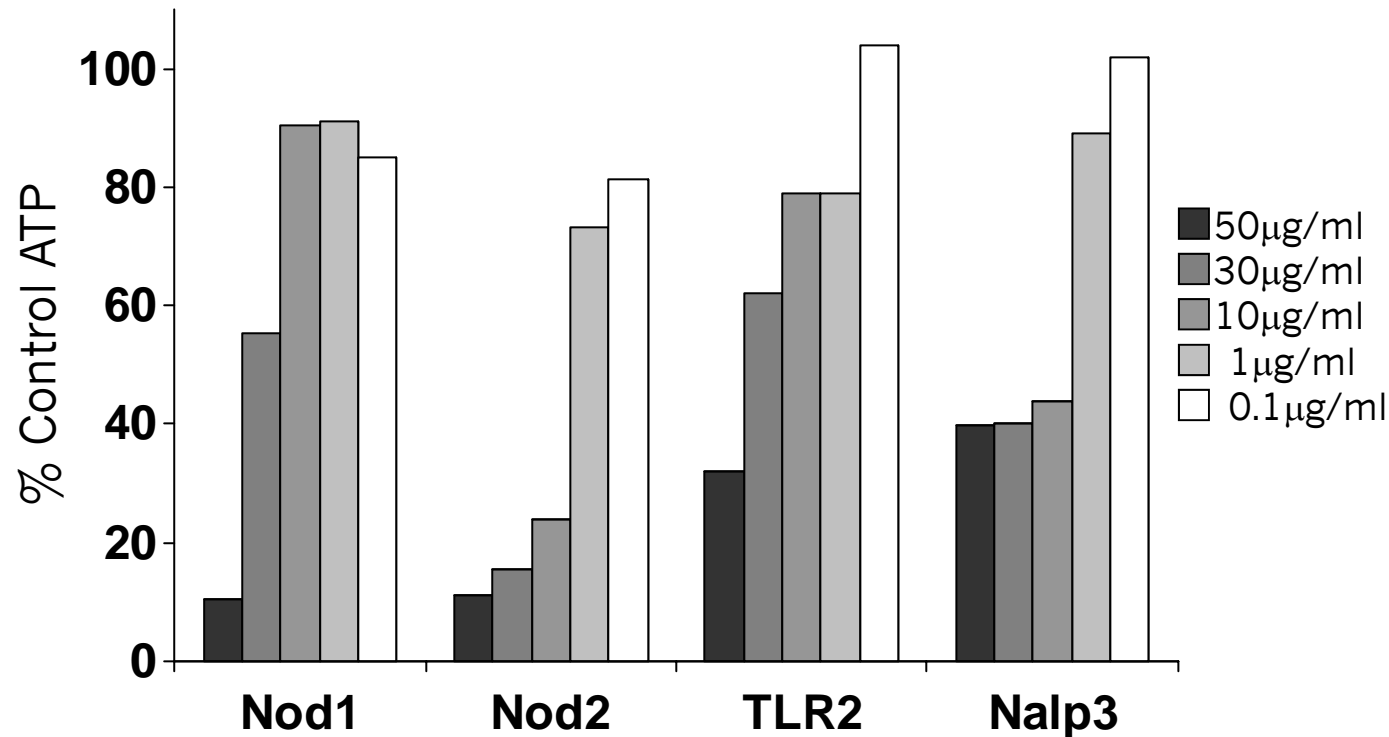

**Supplementary Figure 4.** TLR2 and Nalp3 LRR domains inhibit *L.monocytogenes* viability as demonstrated by ATP-coupled luminescent assay. *L.monocytogenes* ( $5 \times 10^5$  bacteria/100 µl) were incubated with increasing concentrations of the indicated recombinant LRR domains for 6 hours at 37°C and ATP levels assessed by luminescent assay (BacTiter-glo: Promega). Values shown are relative to controls incubated in the absence of LRR domains (100%). Results are representative of two experiments for TLR2 and Nalp3. Recombinant LRR domains derived from CIITA and NAIP showed no activity in a single assay up to 50 µg/ml.
